# Supplementary figures and images for: Dual-indicator approach for real-time milk freshness detection using butterfly pea anthocyanins and riboflavin fluorescence
Source: Royal Society of Chemistry journal article supplement (doi:10.1039/d5fb00467e), 2025-11-18

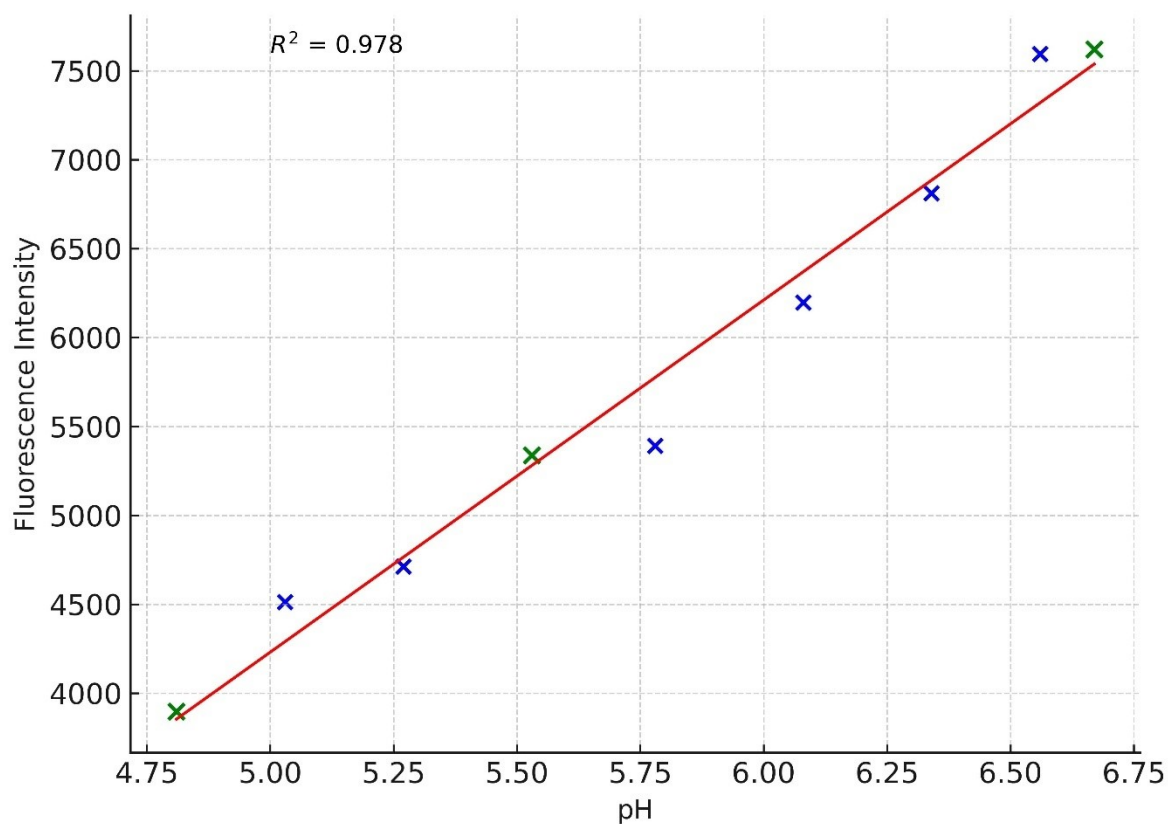

Relation between pH and fluorescence intensity

Supplement: d5fb00467e1.pdf [file d5fb00467e1.pdf]
